# Supplementary material
Source: PubMed Central journal article supplement (PMC6342461)
Supplement: NIHMS1005420-supplement-2.pdf [file NIHMS1005420-supplement-2.pdf]

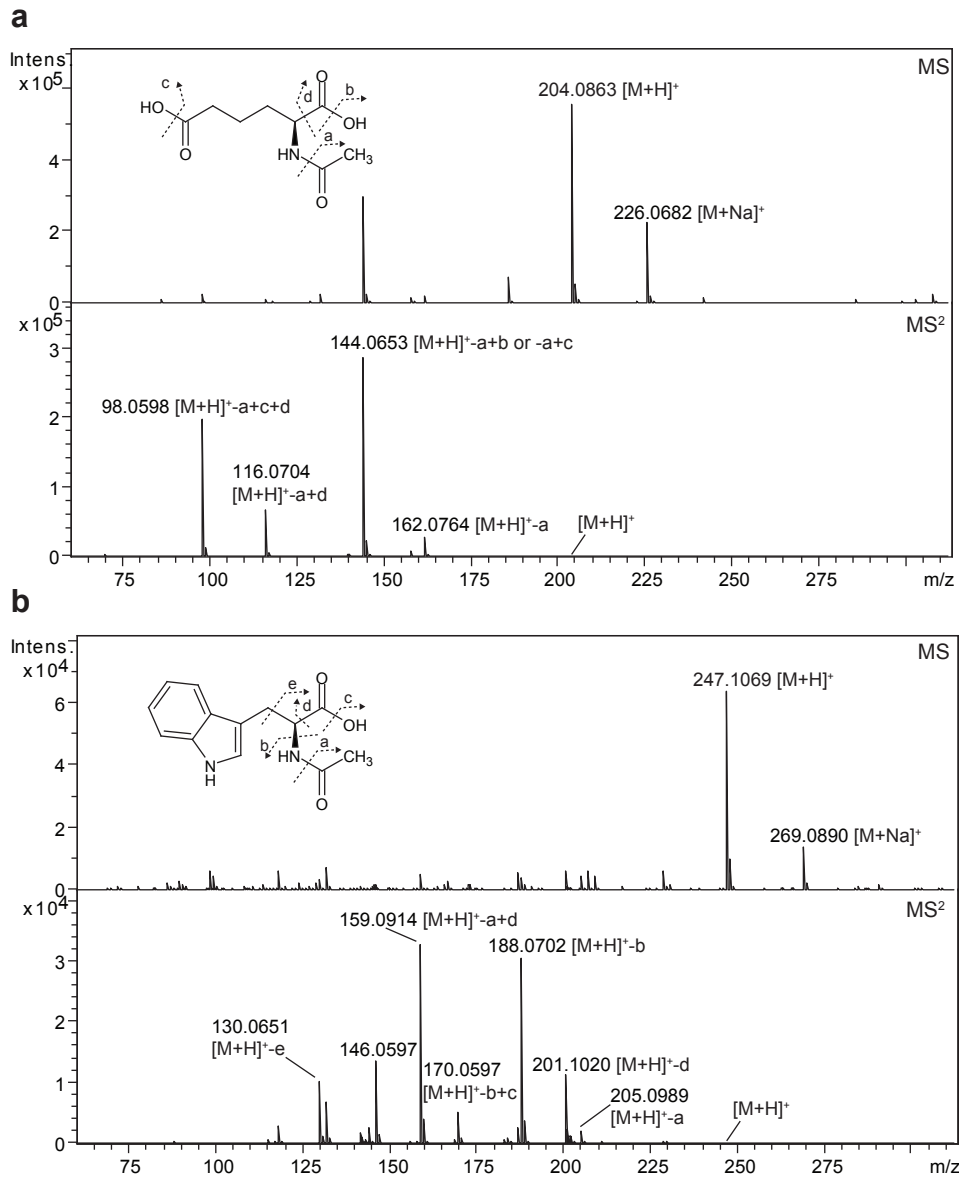

**Supplementary Figure 1 | Liquid chromatography-tandem mass spectrometry (LC-MS2) identification of N-acetyl-L-aminoadipate (a) and N-acetyl-L-tryptophan (b) accumulating in senescent leaves *chl2-1* (FLAG\_076H05).** MS and MS<sup>2</sup> spectra, chemical structures and fragmentation pattern are shown. Calculated [M+H]<sup>+</sup> adducts for acetyl-aminoadipate and acetyl-tryptophan are 204.0866 m/z and 247.1077 m/z, respectively. Note that the fragmentation pattern for N-acetyl-D/L-aminoadipate and N-acetyl-D/L-tryptophan is concordant with the fragmentation pattern of L-aminoadipate, L-tryptophan and N-Acetyl-DL-tryptophan as in METLIN database (<https://metlin.scripps.edu/index.php><sup>36</sup>) and as published previously<sup>25</sup>.

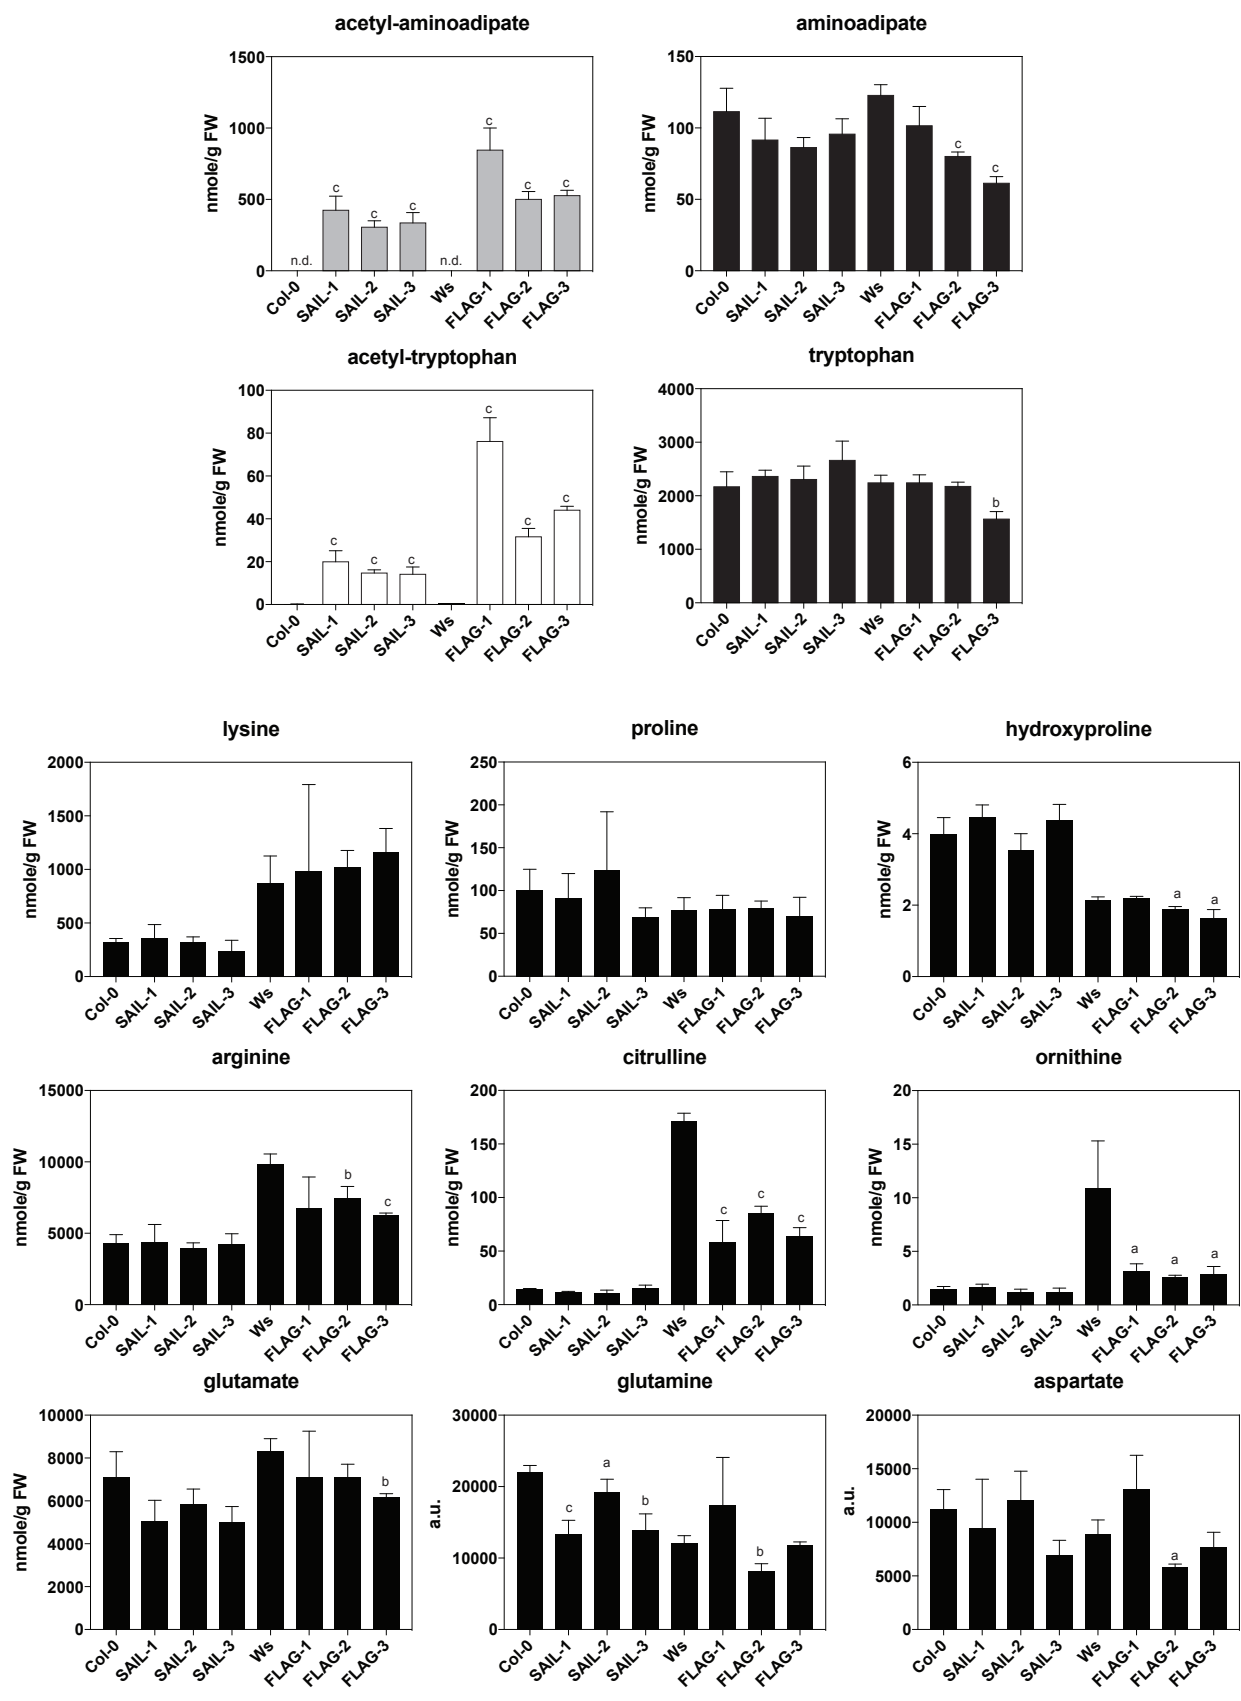

Supplementary Figure 2 | Continues on next page

(continued)

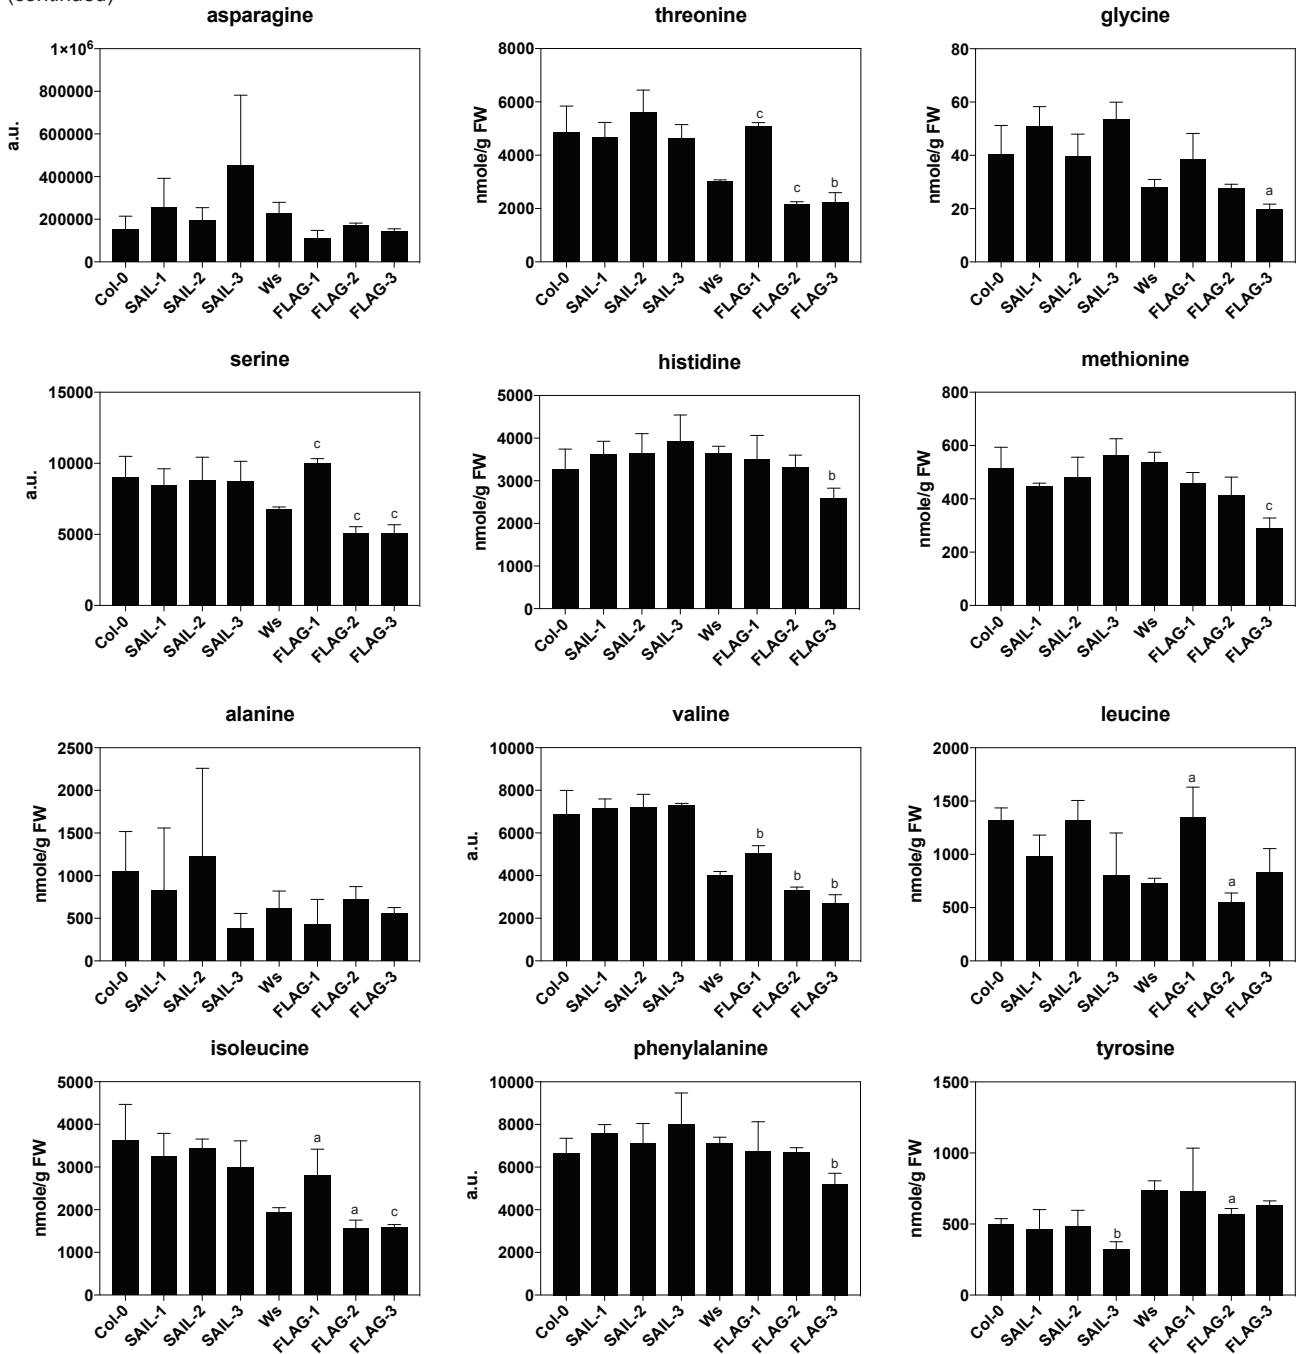

**Supplementary Figure 2 | Quantification of free amino acids in senescent leaves of BAR-containing Arabidopsis.** Absolute quantification of acetyl-aminoadipate, aminoadipate, acetyl-tryptophan and tryptophan, and relative or absolute quantification of 21 other free amino acids in SAIL and FLAG lines. Error bars, mean  $\pm$  s.d. ( $n = 3$  biological replicates). Significance levels were indicated based on unpaired Student t-tests with correction for multiple comparison using the Holm-Sidak method. a,  $p$ -value $<0.1$ ; b,  $p$ -value $<0.05$ ; c,  $p$ -value $<0.01$ . Note that values for a few amino acids are shown as relative levels (a.u., arbitrary unit.) because their concentrations in some samples were more than 10-fold higher than the highest concentration of the standard.

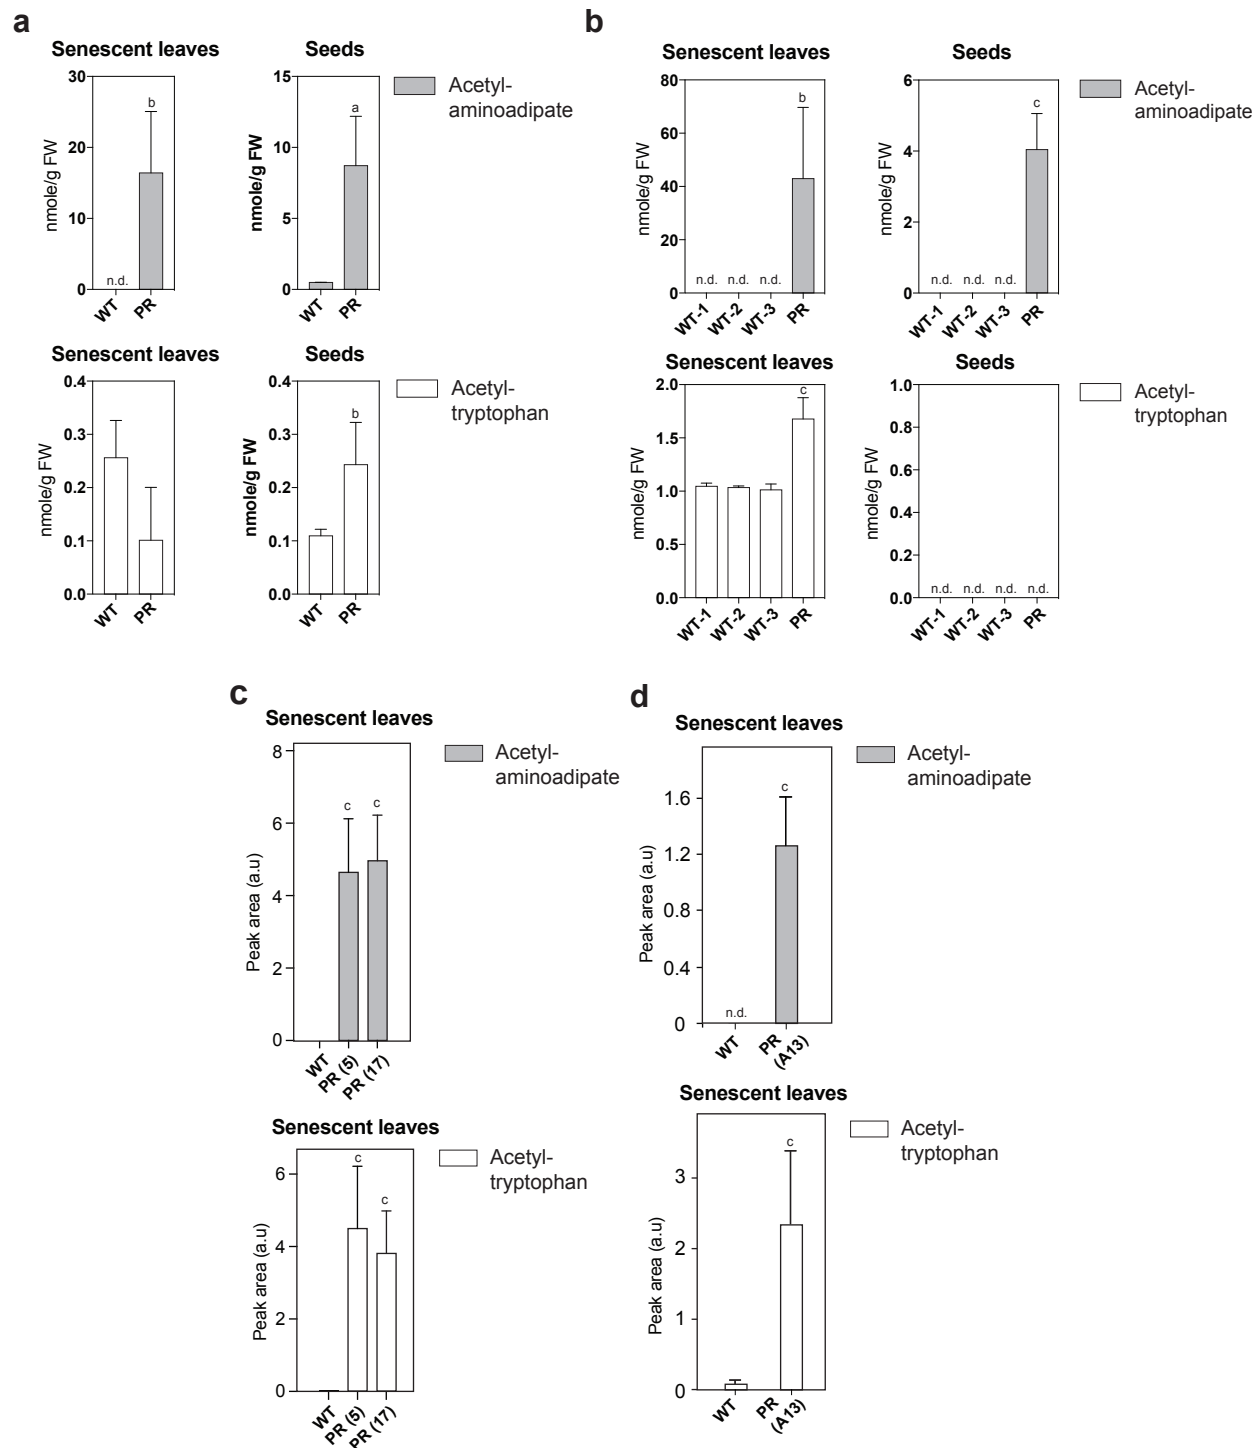

**Supplementary Figure 3 | Accumulation of acetyl-aminoadipate and acetyl-tryptophan in senescent leaves and seeds of phosphinothricin-resistant (PR) *Glycine max*, *Brassica napus*, *Brassica juncea* and *Triticum aestivum*.** a, Absolute quantification of acetyl-aminoadipate and acetyl-tryptophan in senescent leaves and seeds of phosphinothricin-resistant *Glycine max* (WT, Chiba Green wild-type; PR, Liberty Link trait A2704-12 (Bayer CropScience)). b, Absolute quantification of acetyl-aminoadipate and acetyl-tryptophan in senescent leaves and seeds of phosphinothricin-resistant *Brassica napus* (WT-1 (control-1), NDC-E12131; WT-2 (control-2), NDC-E13285; WT-3 (control-3), NDC-E12027; PR, Liberty Link trait L252, Bayer CropScience). Note that isogenic lines controls could not be obtained for *Glycine max* and *Brassica napus* PR lines. c, Relative quantification of acetyl-aminoadipate and acetyl-tryptophan in senescent leaves of phosphinothricin-resistant *Brassica juncea* (WT, wild-type isogenic line; PR (5 and 17), phosphinothricin-resistant lines<sup>31</sup>). d, Relative quantification of acetyl-aminoadipate and acetyl-tryptophan in senescent leaves of phosphinothricin-resistant *Triticum aestivum* (WT, wild-type isogenic line; PR (A13), phosphinothricin-resistant line<sup>32</sup>). Error bars, mean  $\pm$  s.d. (n = 3 biological replicates). Significance levels were indicated based on unpaired Student t-tests. a, p-value<0.1; b, p-value<0.05; c, p-value<0.01. For *Brassica napus*, the highest p-values obtained by comparison of each wild-type with the phosphinothricin-resistant line are indicated.

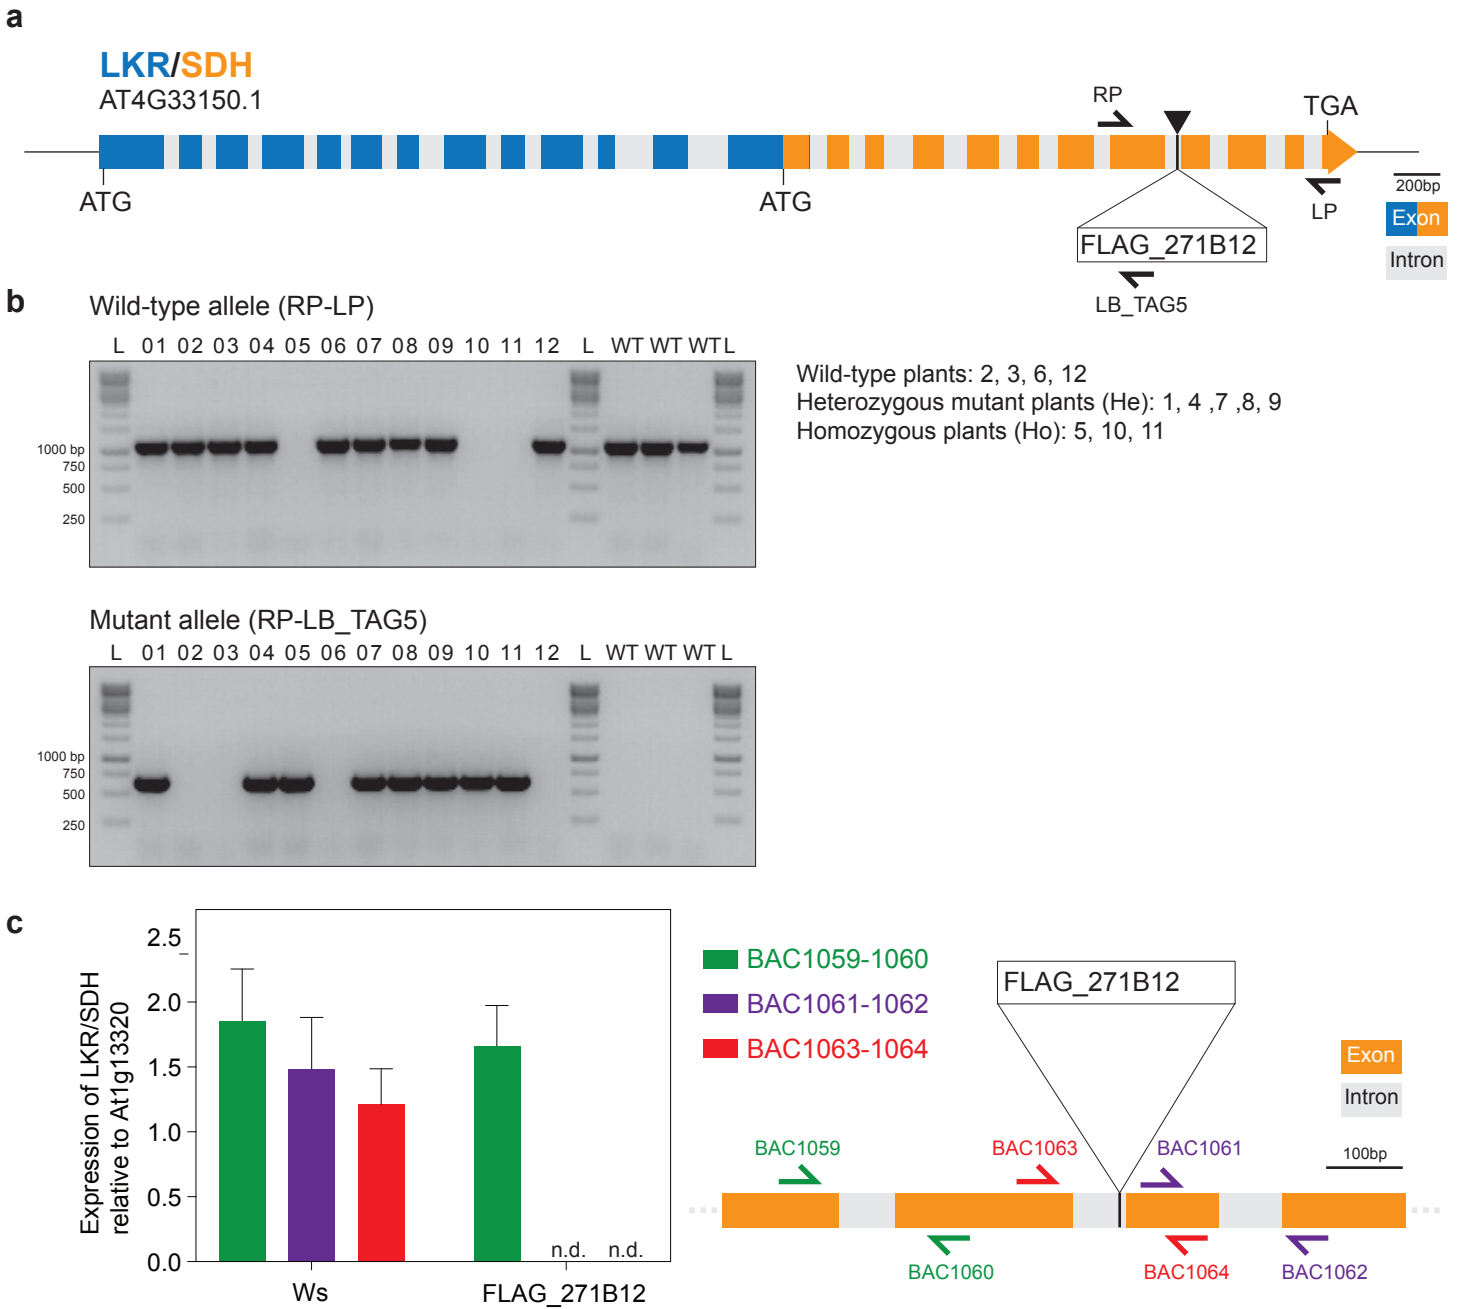

**Supplementary Figure 4 | Genotyping of FLAG\_ *Ikrsdh* and analysis of LKR/SDH expression.** **a**, Gene structure of Arabidopsis LKR/SDH (AT4G33150.1). LKR and SDH exons are depicted in blue and orange, respectively. The T-DNA insertion site and genotyping primers for FLAG\_ *Ikrsdh* (FLAG\_271B12) are indicated. ATG and TGA depict start and stop codons. **b**, Genotyping by PCR of the segregating population (12 plants) of FLAG\_ *Ikrsdh* used for the experiment presented in Figure 2. The genotype of each individual is indicated on the right. WT, Wild-type Wassilewskija control. **c**, Analysis of gene expression in homozygous mutant FLAG\_ *Ikrsdh* by quantitative real-time PCR. The expression of LKR/SDH was normalized to the reference gene At1g13320<sup>30</sup>. The positions of the three primer sets used for this analysis are depicted on the right. n.d., not detected.

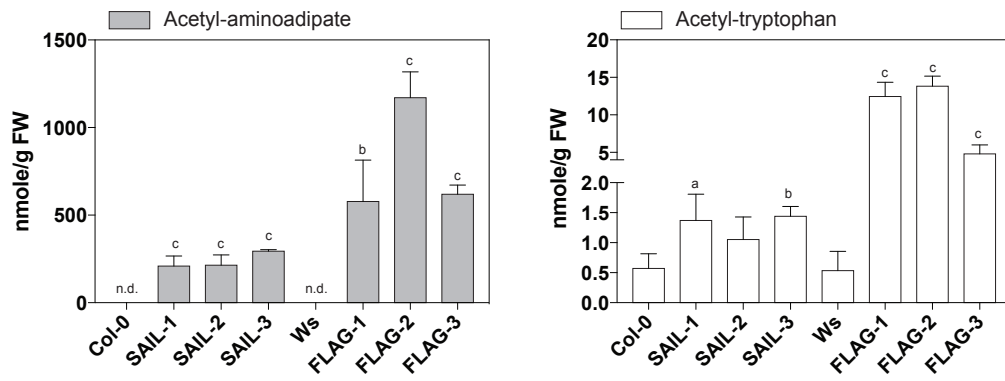

**Supplementary Figure 5 | Absolute quantification of acetyl-aminoadipate and acetyl-tryptophan in seeds of BAR-containing Arabidopsis.** Error bars, mean  $\pm$  s.d. (n = 3 biological replicates). Significance levels were indicated based on unpaired Student t-tests with correction for multiple comparison using the Holm-Sidak method. a, p-value<0.1; b, p-value<0.05; c, p-value<0.01.

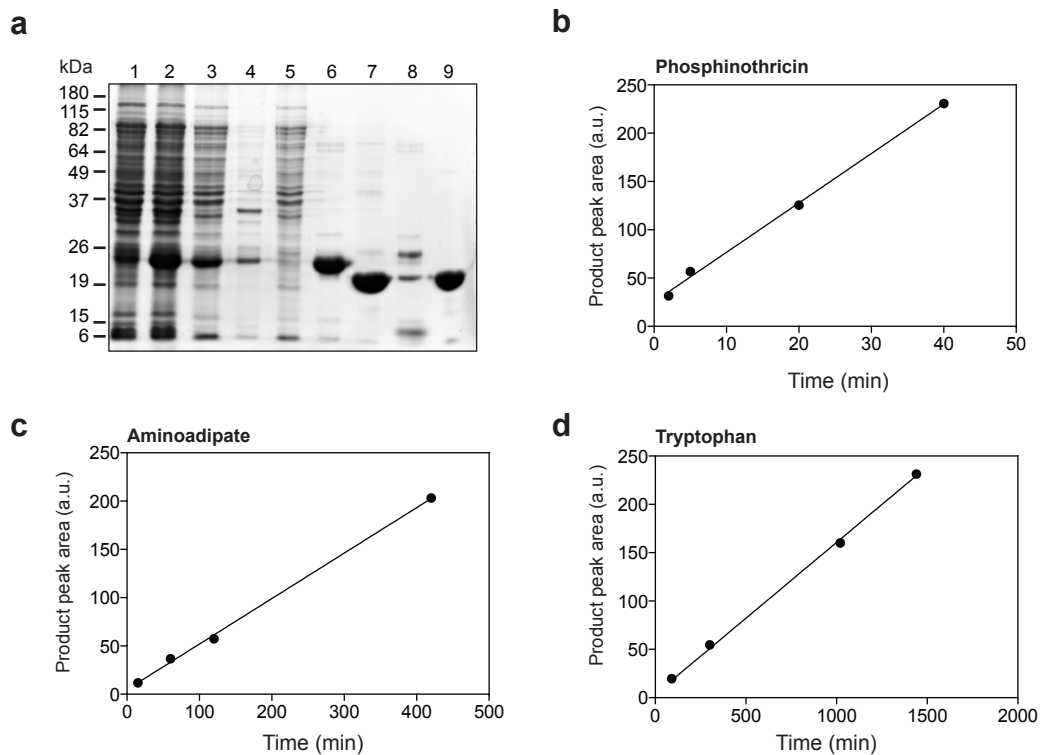

**Supplementary Figure 6 | Purification and time-dependent activities of recombinant BAR from *E. coli*.** **a**, BAR expression and purification was monitored by SDS-PAGE. The 6xHis-BAR protein fusion was isolated from the *E. coli* lysate (lane 1, uninduced cells; lane 2, induced cells; lane 3, soluble proteins; lane 4, insoluble proteins) by metal affinity chromatography ( $\text{Ni}^{2+}$ -charged HisTrap (GE Healthcare)); lane 5, flow-through; lane 6, 6xHis-BAR elution). Partially purified 6xHis-BAR protein fusion was then treated with 6xHis-TEV protease<sup>37</sup> and passed through the HisTrap to remove the His-tag (lane 7, flow-through; lane 8, elution of 6xHis-TEV and uncut 6xHis-BAR) and further purified by gel exclusion chromatography (lane 9). Time-dependent activities of purified 6xHis-BAR were determined at substrate concentration of 500  $\mu\text{M}$  for phosphinothricin (**b**) and 1000  $\mu\text{M}$  for amino adipate (**c**) and tryptophan (**d**). a.u., arbitrary unit.

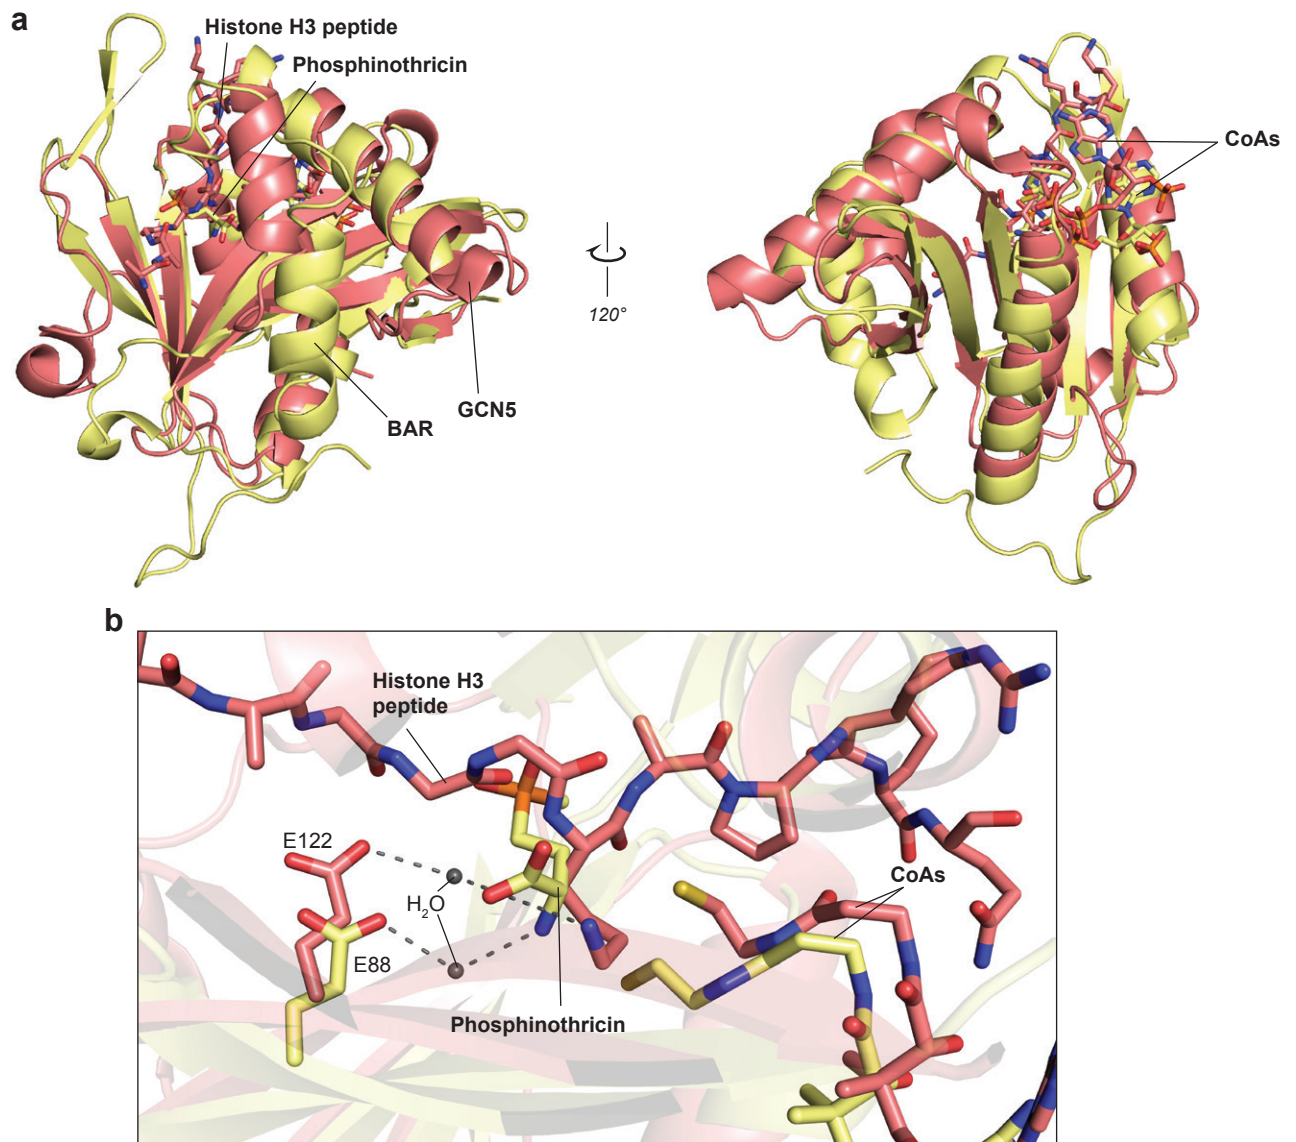

**Supplementary Figure 7 | Structural alignment of BAR/CoA/phosphinothricin ternary complex (yellow) and *Tetrahymena* GCN5 bound to CoA and histone H3 peptide (red, PBD ID: 1QSN). a, Diagram showing two views of the alignment performed using the SSM structural alignment function under Coot<sup>41</sup>. b, Close-up view of the active site.**



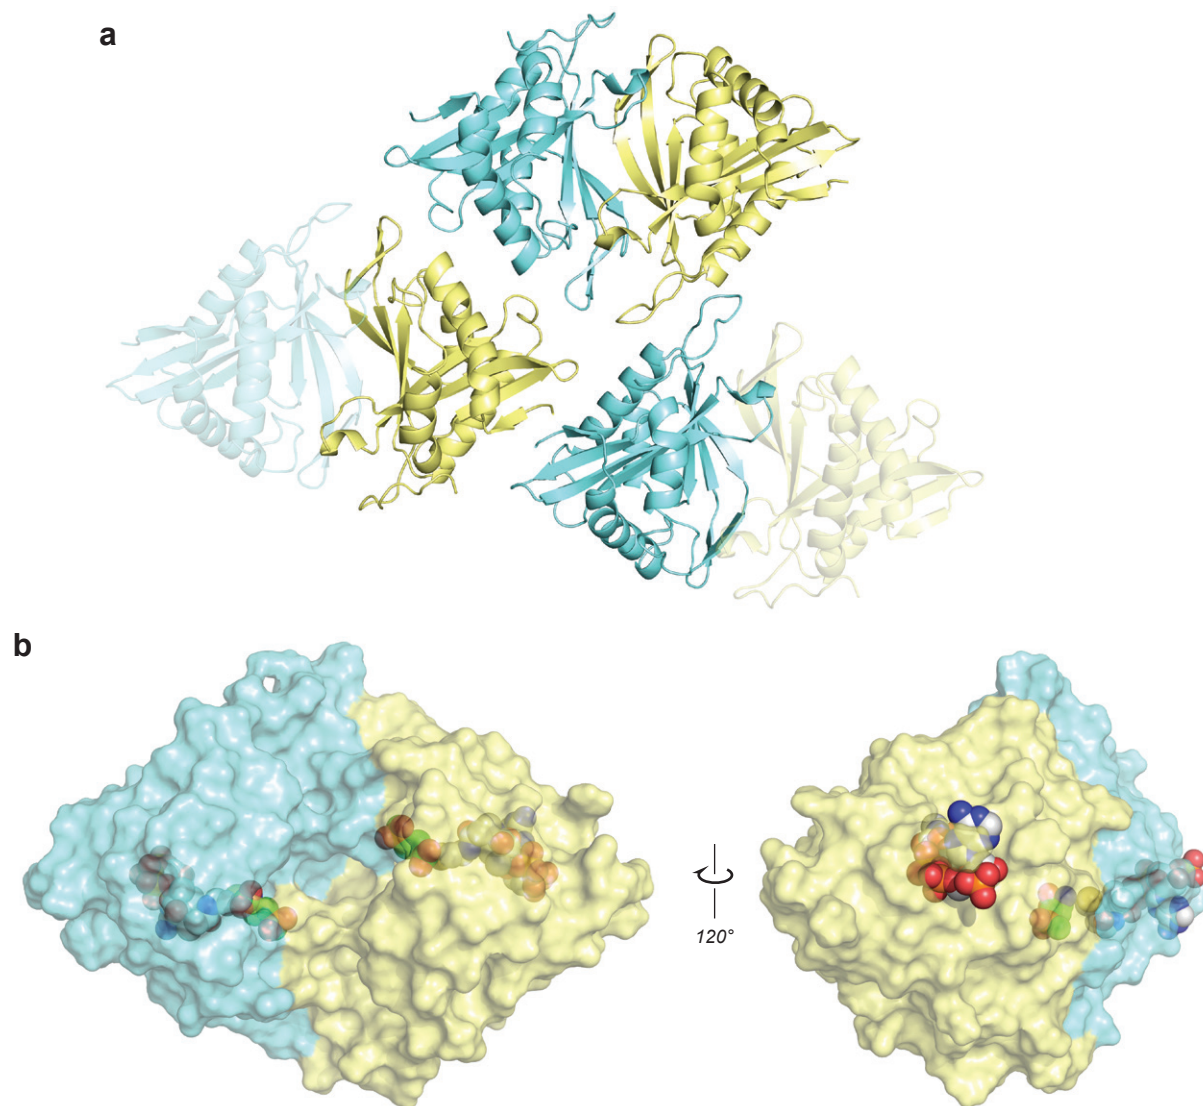

**Supplementary Figure 8 | BAR crystallizes as homodimer with two active sites symmetrically distributed around the dimer interface. a.** Each asymmetric unit (ASU) is constituted of one homodimer and two monomers that form homodimer with chains from neighboring cells (shown as transparent chains). **b.** Surface representation of BAR revealing a large open cavity at the dimer interface.

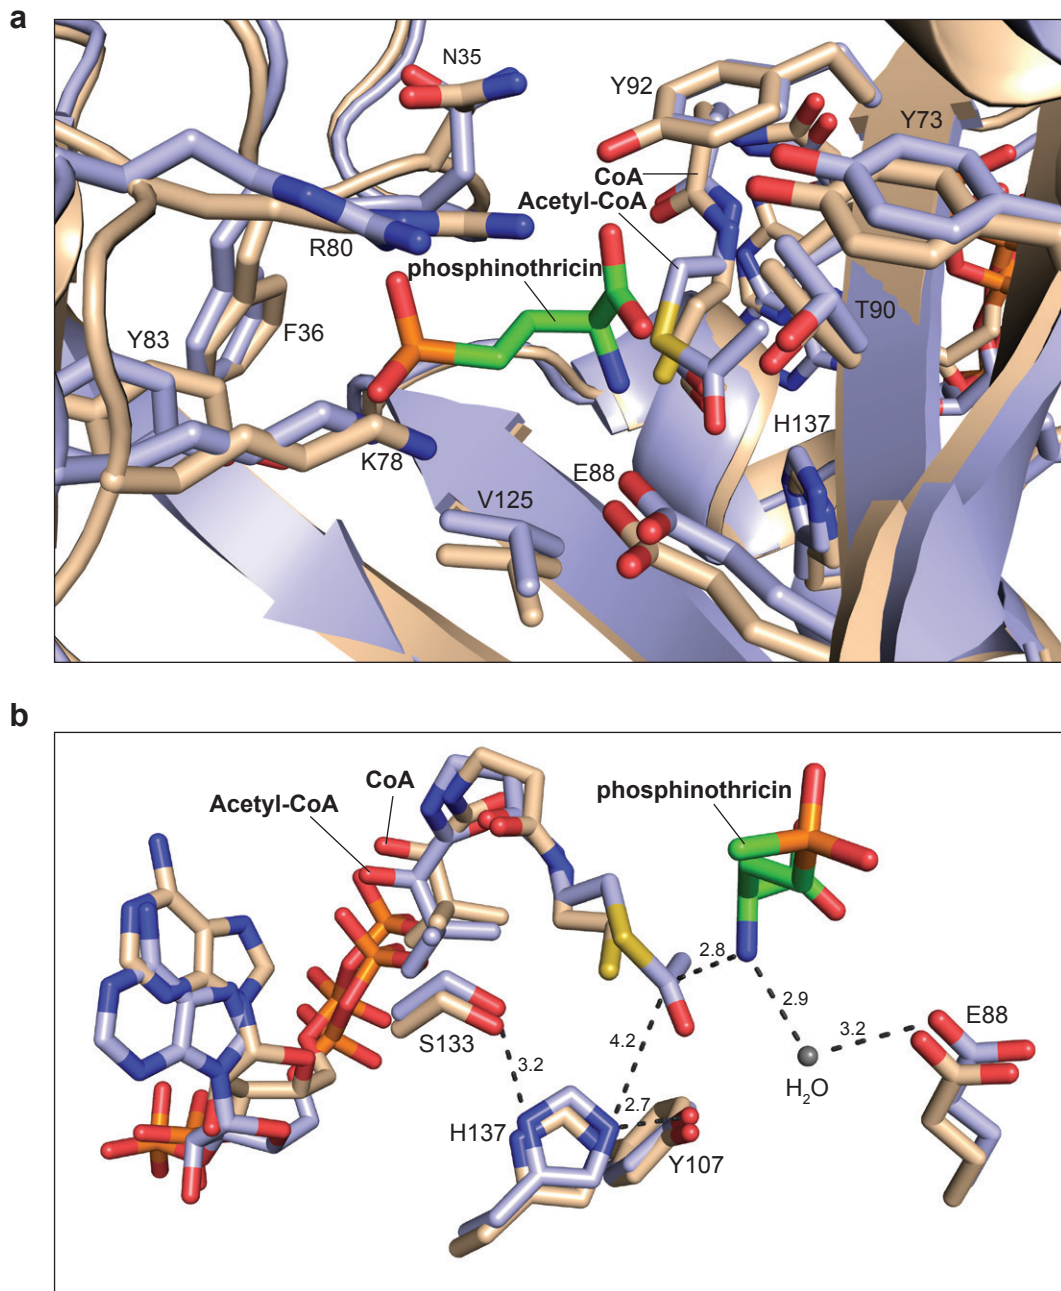

**Supplementary Figure 9 | Structural alignment of the BAR/acetyl-CoA holocomplex (purple) with the BAR/CoA/phosphinothricin ternary complex (brown). a, Close-up of view of the active site of BAR. b, Diagram showing the residues involved in catalysis. Distances are shown in Angstroms.**

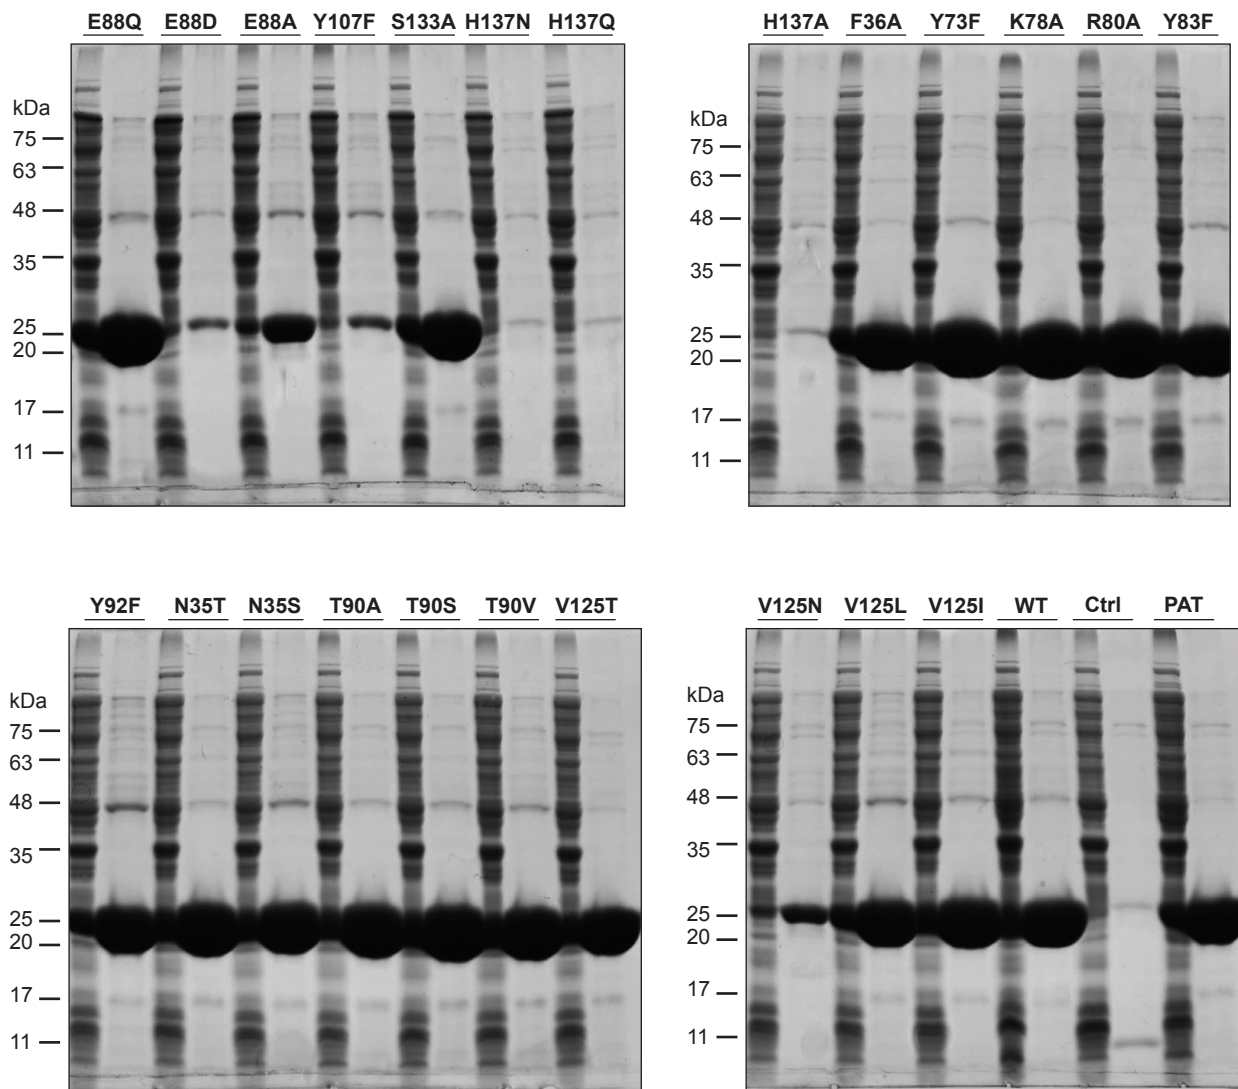

**Supplementary Figure 10 | Expression and purification of 23 recombinant mutant versions of BAR and wild-type PAT from *E.coli*.** Left SDS-PAGE lane, soluble fraction of *E.coli* lysate; right lane, purified protein; Ctrl, empty vector.

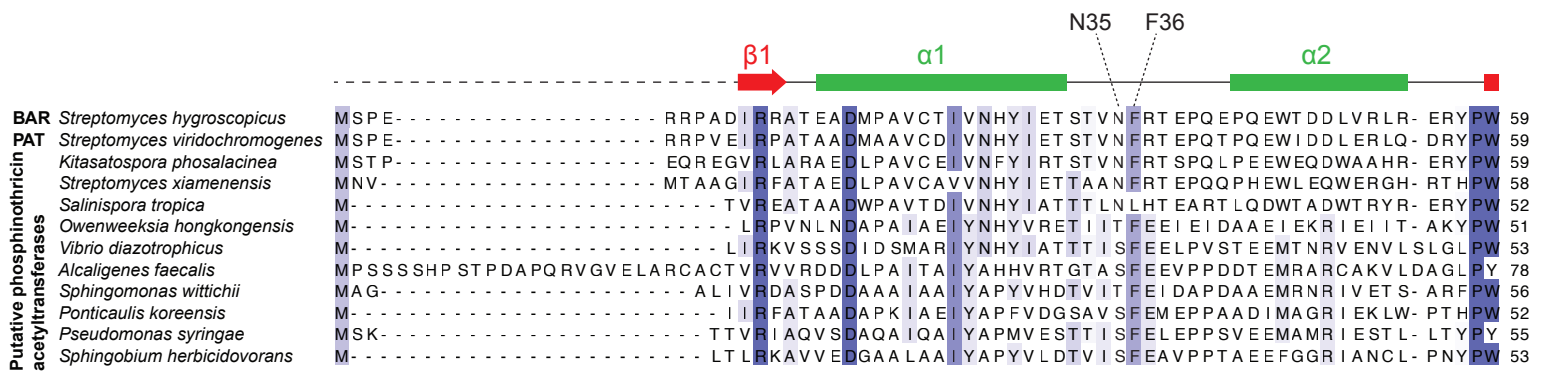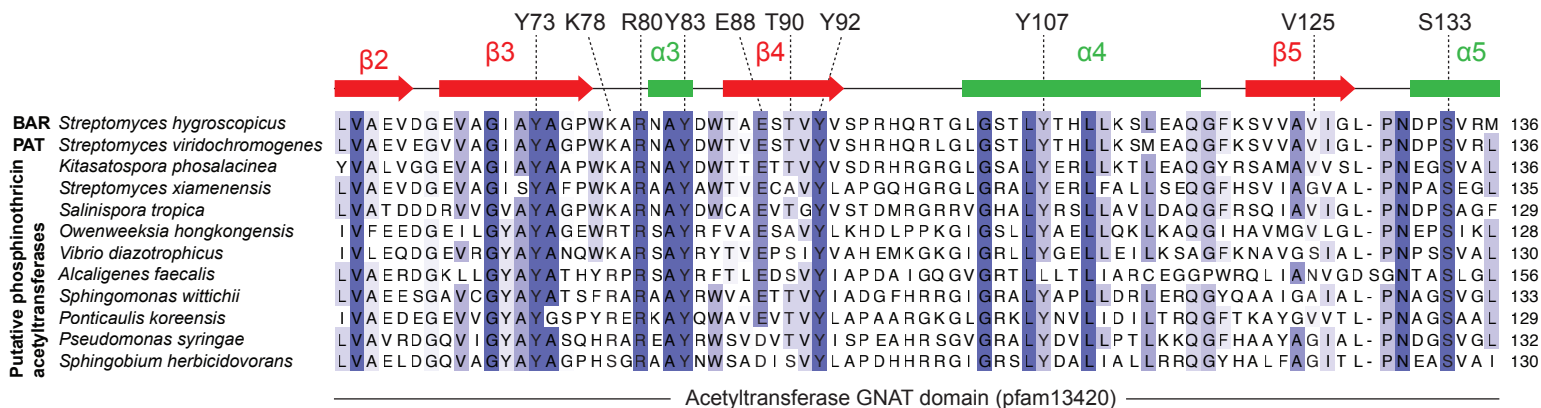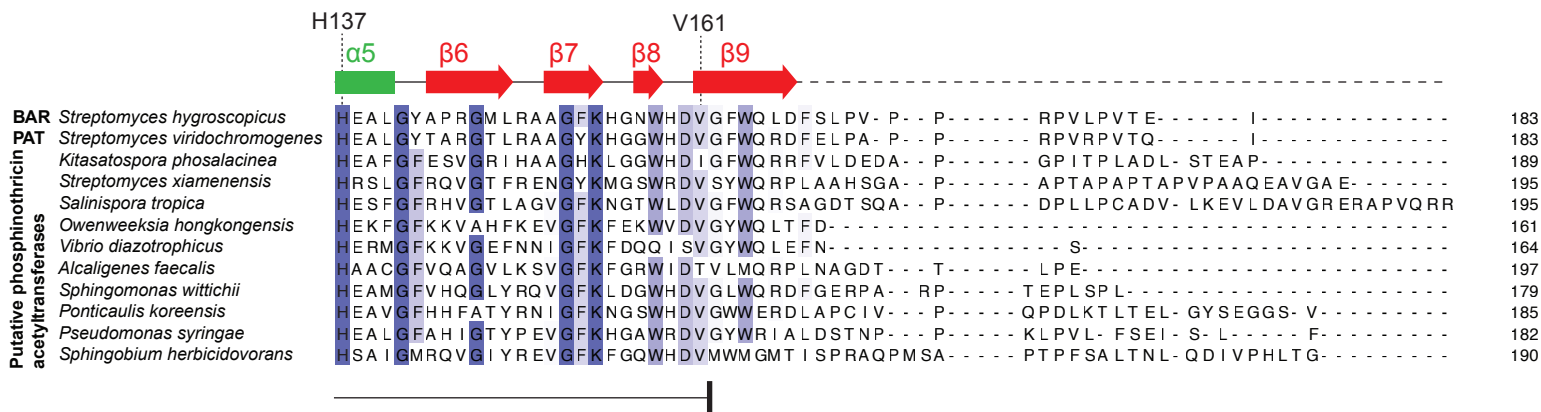

**Supplementary Figure 11 | Protein sequence alignment of BAR from *Streptomyces hygroscopicus*, PAT from *Streptomyces viridochromogenes* and closely related homologues from other species.** Active site residues as displayed in Fig. 4b are labelled. The alignment was performed using Jalview V2 (T-Coffee, default settings<sup>53</sup>). Secondary structure of BAR as labelled in Fig. 4a is shown. The acetyltransferase GNAT domain (pfam13420) is displayed. Protein sequences related to BAR from *Streptomyces hygroscopicus* were retrieved from GenBank at the NCBI website using protein BLAST search (<http://blast.ncbi.nlm.nih.gov/Blast.cgi>). Protein sequence accessions (GenBank): *Streptomyces hygroscopicus*: CAA29262; *Streptomyces viridochromogenes*, WP\_003988626; *Kitasatospora phosalacinea*, WP\_033213694; *Streptomyces xiamenensis*, AKG45686; *Salinispora tropica*, WP\_028566484; *Owenweeksia hongkongensis*, WP\_014202881; *Vibrio diazotrophicus*, WP\_042485812; *Alcaligenes faecalis*, CAA00175; *Sphingomonas wittichii*, WP\_037526498; *Ponticaulis korensis*, WP\_022694195; *Pseudomonas syringae*, WP\_032656505; *Sphingobium herbicidovorans*, WP\_037462269.

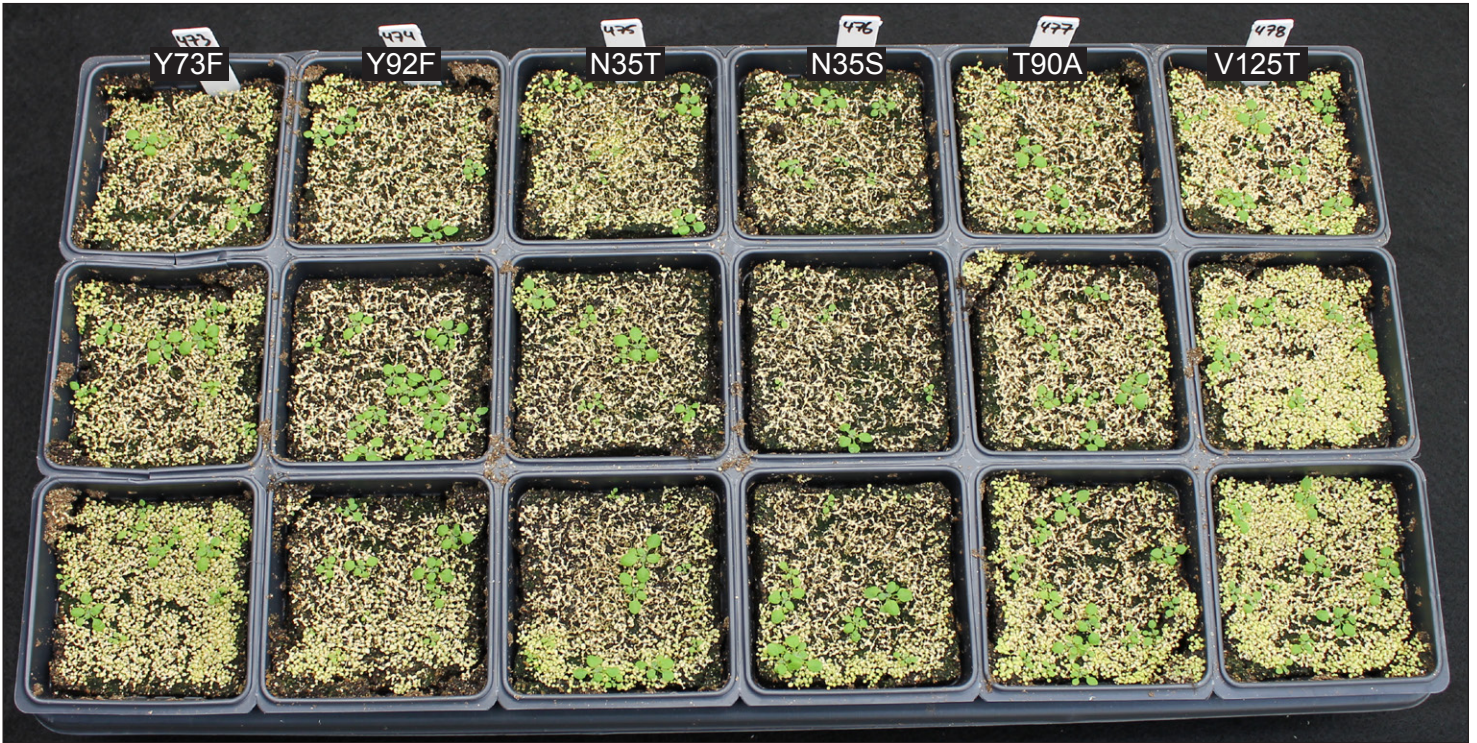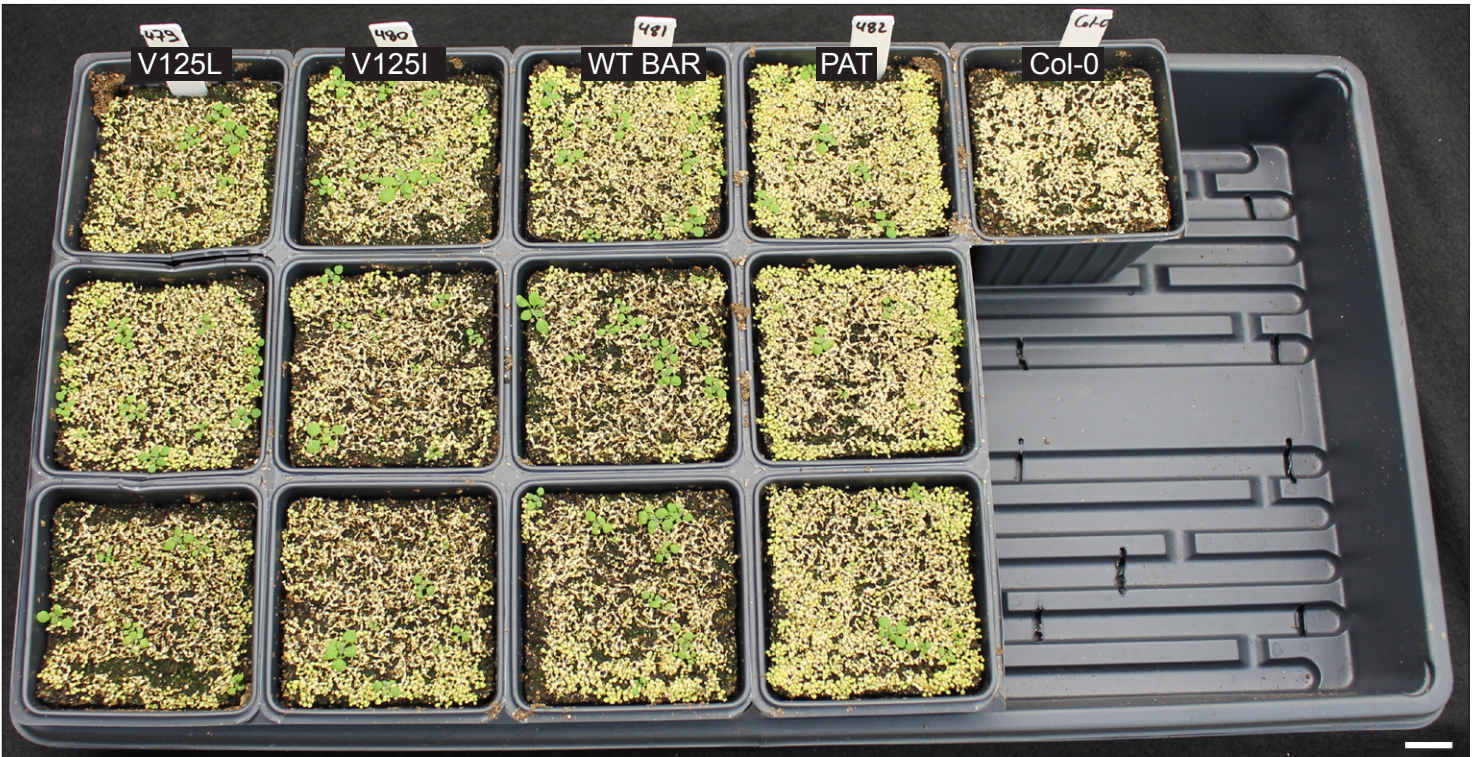

**Supplementary Figure 12 | Selection of T1 transgenic Arabidopsis transformed with BAR variants.** Photographs of Arabidopsis T1 lines transformed with wild-type BAR from *Streptomyces hygroscopicus* (WT BAR), PAT from *Streptomyces viridochromogenes* and selected BAR mutants taken 10 days after Finale® application. Scale bar = 1 cm

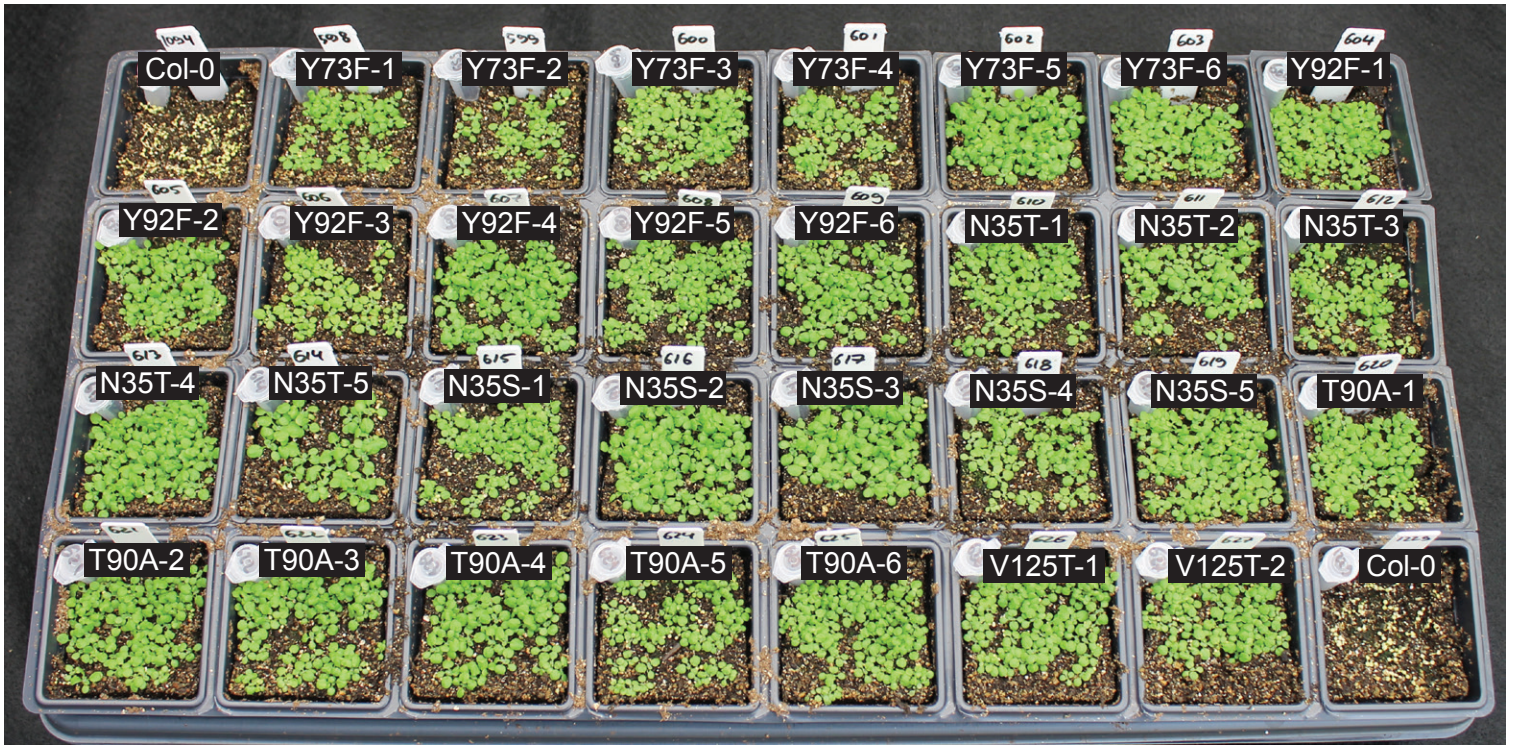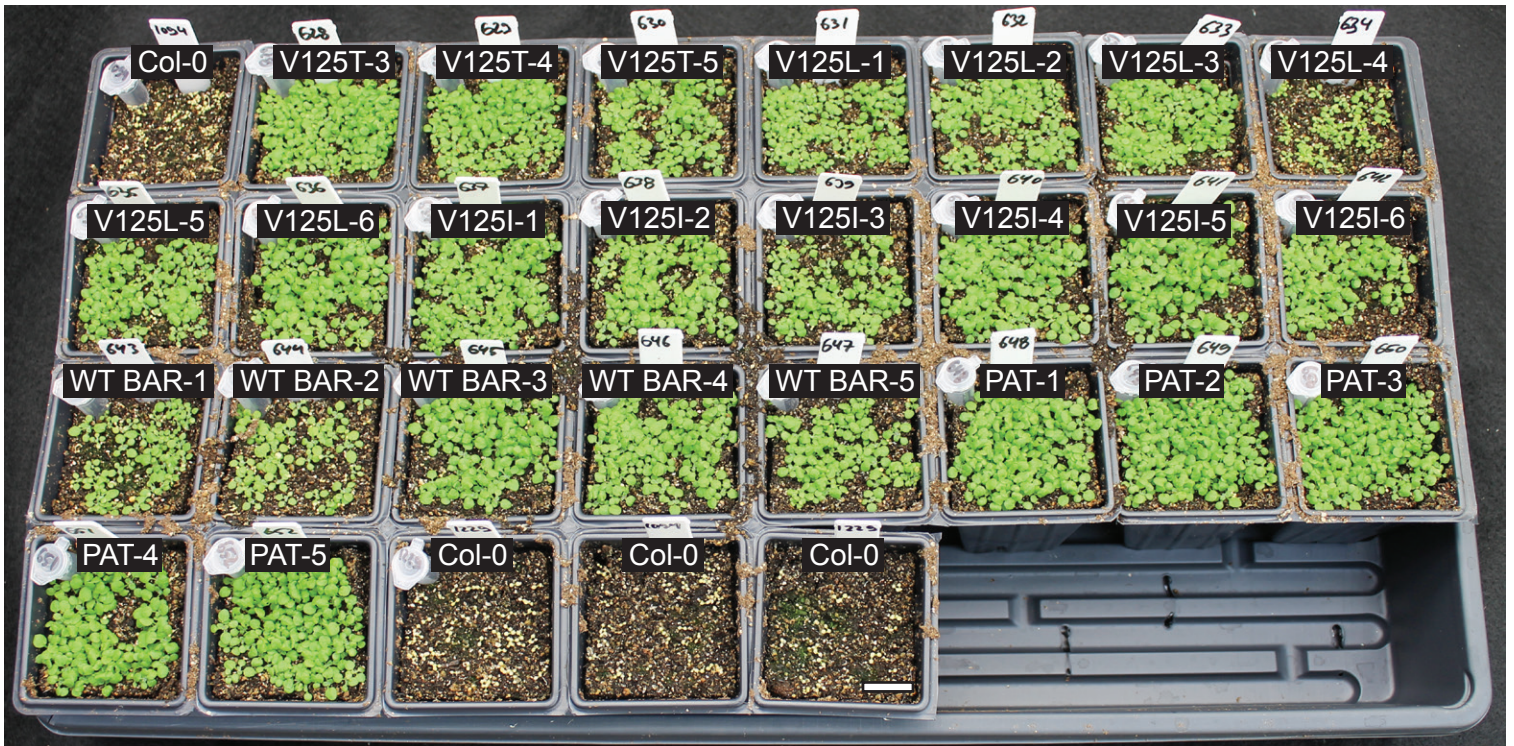

**Supplementary Figure 13 | Resistance to phosphinothricin of T2 transgenic *Arabidopsis* transformed with BAR variants.** 17-day old transgenic T2 plants were sprayed with Finale® and further grown for 8 days. b, Photographs were taken before and after Finale® application. Scale bar = 1 cm

**a**

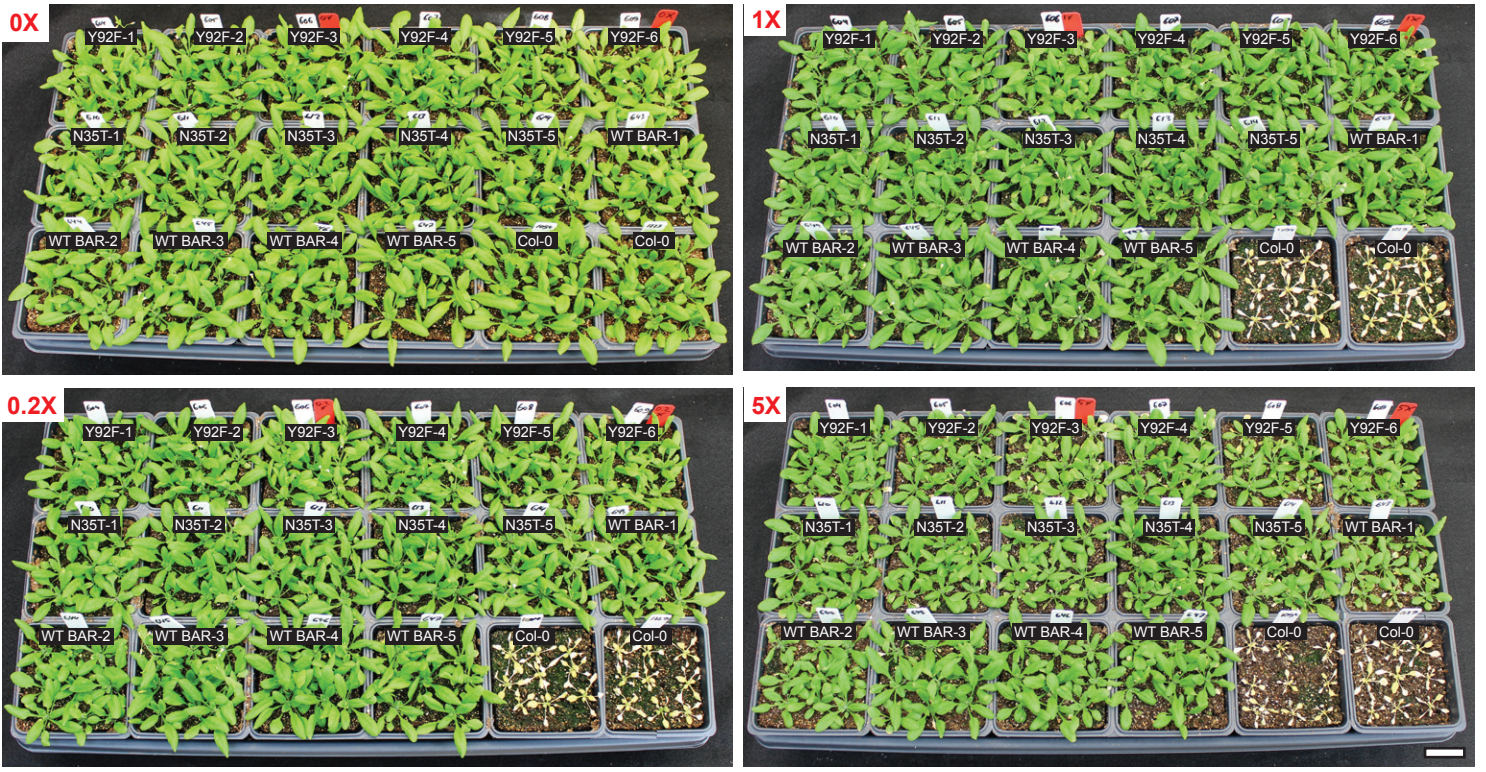

**b**

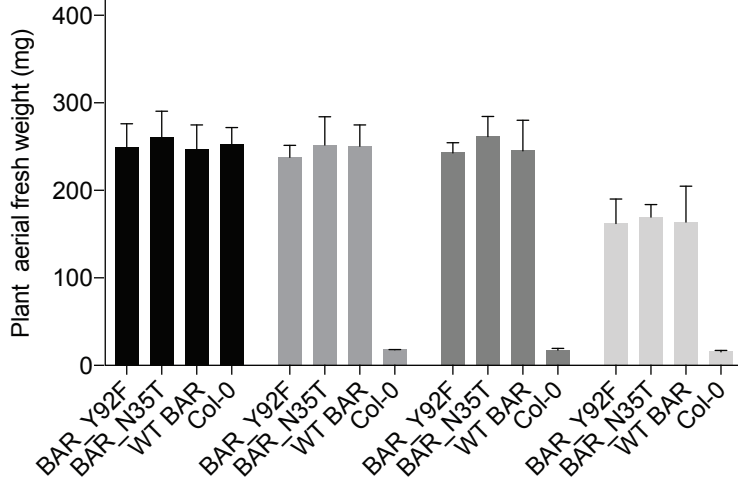

**Herbicide application**

- 0X, no herbicide treatment
- 0.2X, Finale® at 1:2500, 0.004532% glufosinate ammonium, 3.1 µg/cm<sup>2</sup>
- 1X, Finale® at 1:500, 0.02266% glufosinate ammonium, 15.4 µg/cm<sup>2</sup>
- 5X, Finale® at 1:100, 0.1133% glufosinate ammonium, 77.0 µg/cm<sup>2</sup>

**Supplementary Figure 14 | Resistance to phosphinothricin of transgenic *Arabidopsis* transformed with BAR variants Y92F, N35T and WT BAR. a,** Seventeen-days old transgenic T2 plants were sprayed with 3 different concentrations of Finale® and further grown for 8 days. Photographs were taken 8 days after Finale® application. Scale bar = 1 cm. **b,** Average fresh weight were measured for each population 8 days after Finale® application. Error bars, mean of plant aerial fresh weight ± s.d. (n = 6 (Y92F), 5 (N35T), 5 (WT BAR), 2 (Col-0) biological replicates from individual populations). The weight of 7-9 plants were measured and average for each individual population.

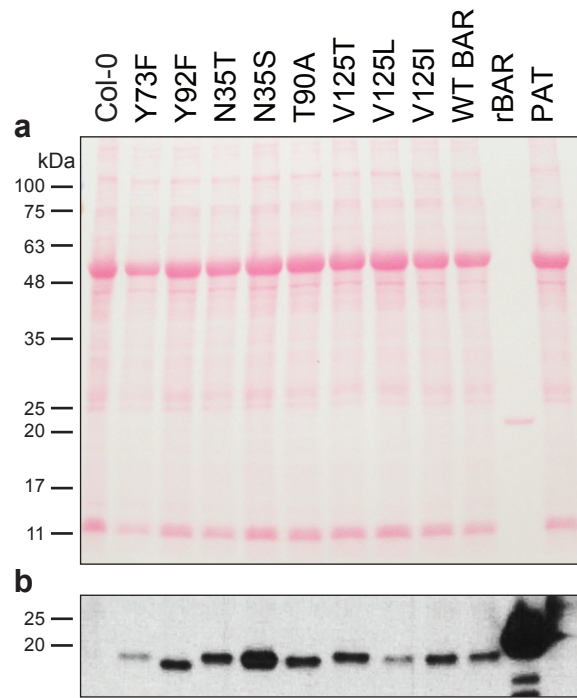

**Supplementary Figure 15 | Protein levels of BAR variants in Arabidopsis.** **a**, Total proteins were extracted from T2 plants, separated by SDS-PAGE, transferred to nitrocellulose membrane and stained by Ponceau S. For each protein extraction, equal amounts of aerial tissues from 5-6 T2 populations grown from seeds from independent T1 plants were pooled. **b**, Detection of BAR by anti-BAR immunoblotting of the membrane shown in panel (a). rBAR, recombinant BAR from *E.coli*.



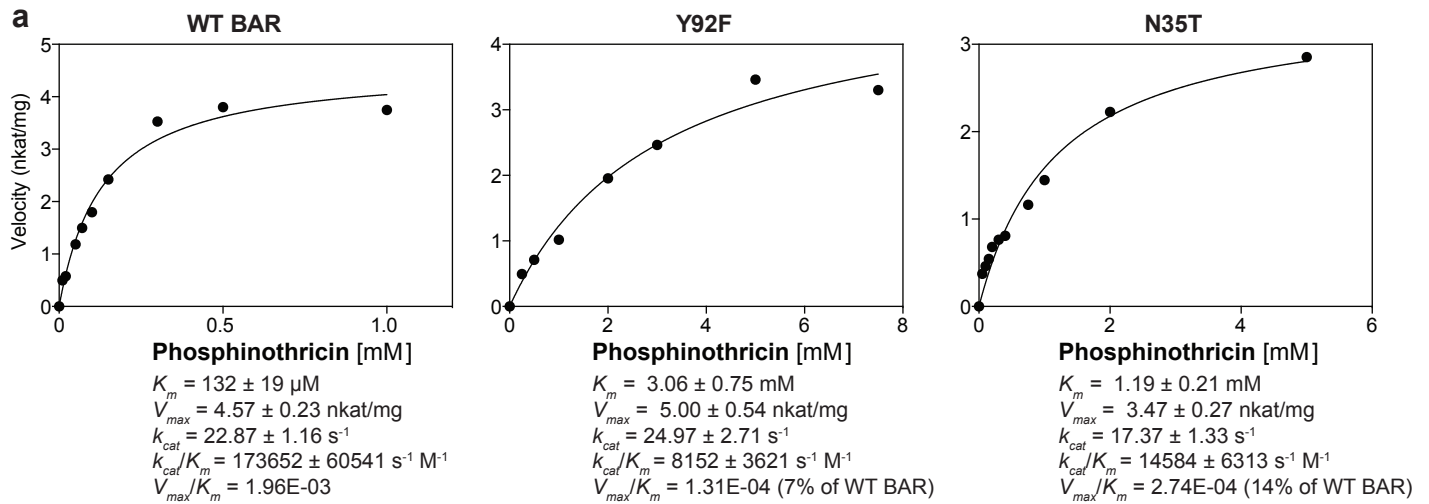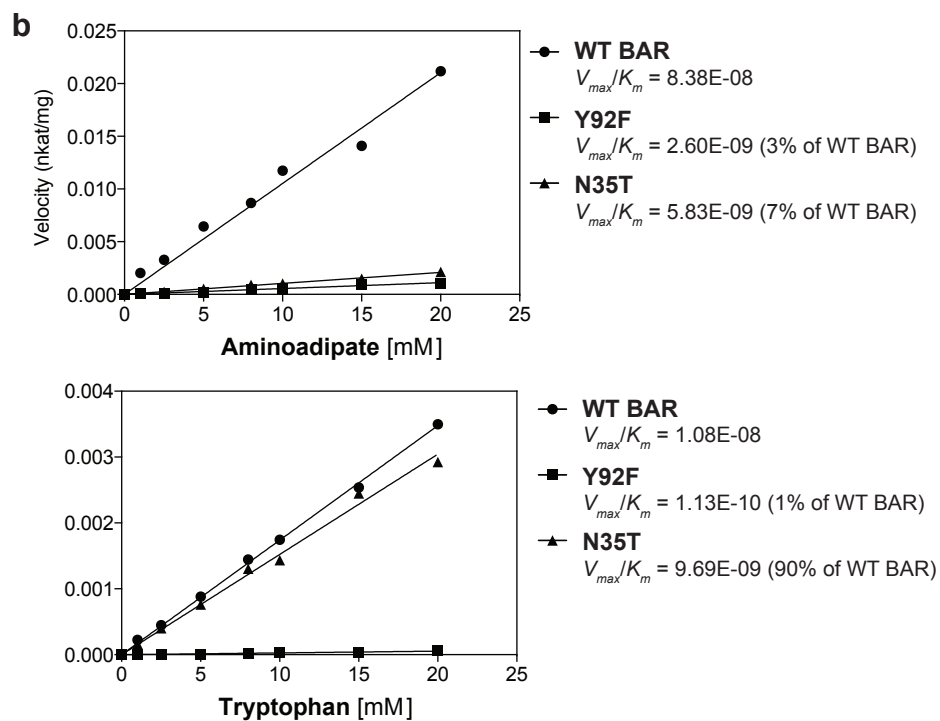

**Supplementary Figure 16 | *In vitro* enzyme kinetic assays of wild-type BAR (WT BAR, as shown in Fig. 3) and BAR variants Y92F and N35T against native (a) and non-native substrates (b). Calculated  $K_m$ ,  $V_{max}$ ,  $k_{cat}$ ,  $k_{cat}/K_m$  and  $V_{max}/K_m$  values for phosphinothricin are indicated, as well  $V_{max}/K_m$  values for aminoadipate and tryptophan (estimated from Lineweaver-Burk plots). Note that aminoadipate and tryptophan reached solubility limit before reaching saturation concentration for WT BAR, Y92F and N35T.**

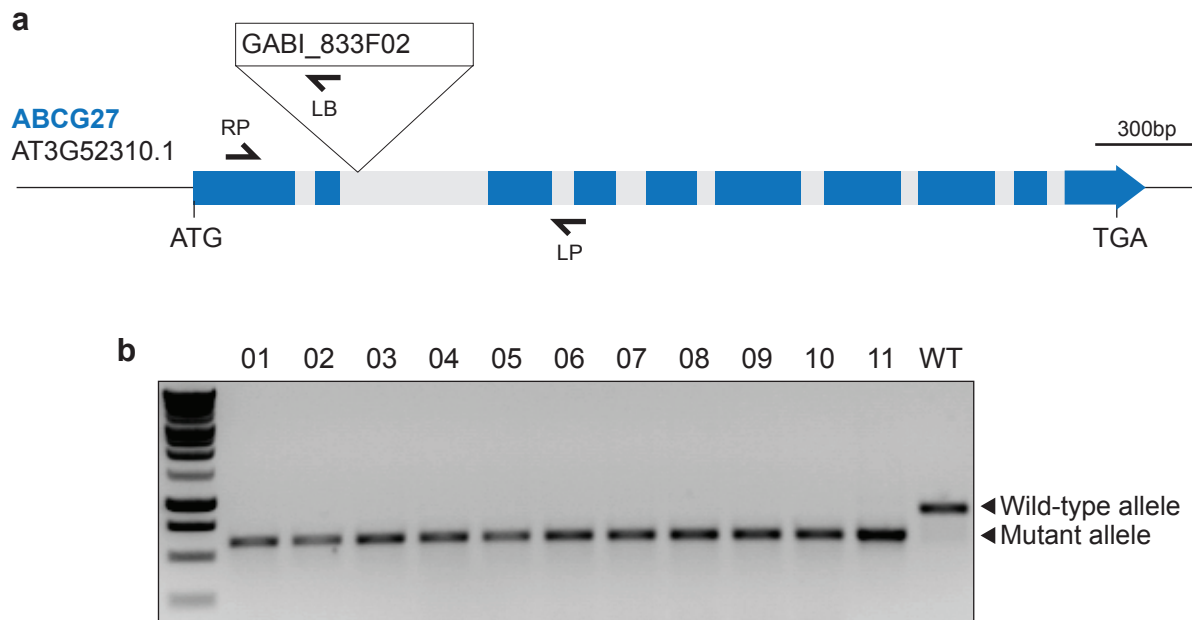

**Supplementary Figure 17 | Genotyping of GABI\_833F02.** **a**, Gene structure of Arabidopsis ABCG27 (AT3G52310.1). Exons and introns are depicted in blue and gre, respectively. The T-DNA insertion site and genotyping primers are indicated. ATG and TGA depict start and stop codons. **b**, Genotyping by PCR of 11 homozygous mutant plants of GABI\_833F02 (PCRs were performed with the 3 primers shown in (a) in single reactions). WT, Wild-type Columbia-0 control.
